# Supplementary material for: Moving Biosurveillance Beyond Coded Data: AI for Symptom Detection from Physician Notes
Source: bioRxiv or medRxiv preprint supplement (doi:10.1101/2023.09.24.23295960), 2023-09-25
Supplement: Supplementary file [file media-1.pdf]

## Supplement 1. COVID-19 Symptom Annotation Guide.

Supplementary information for:

Moving Biosurveillance Beyond Coded Data: AI for Symptom Detection from Physician Notes

Andrew McMurry,<sup>1,2</sup> Amy R Zipursky,<sup>1,3</sup> Alon Geva,<sup>1,4,5</sup> Karen L Olson,<sup>1,2</sup> James Jones,<sup>1,2</sup> Vlad Ignatov,<sup>1</sup> Timothy Miller,<sup>1,2</sup> Kenneth D Mandl<sup>1,2,6,\*</sup>

<sup>1</sup> Computational Health Informatics Program, Boston Children's Hospital, Boston, Massachusetts, United States of America

<sup>2</sup> Department of Pediatrics, Harvard Medical School, Boston, Massachusetts, United States of America

<sup>3</sup> Division of Emergency Medicine, The Hospital for Sick Children, Toronto, Ontario, Canada

<sup>4</sup> Division of Critical Care Medicine, Department of Anesthesiology, Critical Care, and Pain Medicine, Boston Children's Hospital, Boston, Massachusetts, United States of America

<sup>5</sup> Department of Anaesthesia, Harvard Medical School, Boston, MA, USA

<sup>6</sup> Department of Biomedical Informatics, Harvard Medical School, Boston, Massachusetts, United States of America

\*Corresponding author

E-mail: [kenneth\\_mandl@harvard.edu](mailto:kenneth_mandl@harvard.edu) (KDM)

## COVID-19 Symptom Annotation Guide

Three expert reviewers reached consensus on three criteria for annotating positive mentions of COVID-19 symptoms in ED physician notes. The three criteria are applied in series (1) encounter time criteria; (2) ED note section criteria; and (3) symptom specific criteria.

**Criteria 1: Encounter time.** Symptoms must be relevant to the present ED encounter either as the reason for visit, documented symptom, or observed sign.

| Encounter Time       | Include                                     | Exclude                                                                          |
|----------------------|---------------------------------------------|----------------------------------------------------------------------------------|
| Prior to encounter   | Chief complaint or patient reason for visit | Symptoms recorded for an illness or condition unrelated to the current encounter |
| Present ED encounter | Yes                                         | Symptoms recorded for an illness or condition unrelated to the current encounter |
| Future encounter     | Never                                       | Always                                                                           |

**Criteria 2: ED Note Section.** Patient symptoms are present and not related to past medical history or a medication prescribed unrelated to the present encounter.

| ED Note Section                         | Include         | Exclude                                          |
|-----------------------------------------|-----------------|--------------------------------------------------|
| Chief complaint                         | Symptom present |                                                  |
| History of presenting illness           | Symptom present |                                                  |
| Review of systems                       | Symptom present |                                                  |
| Physical exam                           | Symptom present |                                                  |
| Vital signs                             | Fever present   |                                                  |
| Family history                          |                 | Always (e.g. brother had a cough)                |
| Past medical history                    |                 | Always (e.g. patient had cough three months ago) |
| Social history                          |                 | Always (e.g. contacts in daycare have vomiting)  |
| Medication list                         |                 | Always (e.g. albuterol PRN for cough)            |
| Investigations                          |                 | Always (e.g. opacity on chest x-ray)             |
| Assessment and plan, course, evaluation | Symptom present |                                                  |
| Final diagnosis                         | Symptom present |                                                  |
| Discharge Instructions                  | Symptom present |                                                  |

**Criteria 3: Symptom specific.** Positive symptom mentions explicitly state the symptom or a predefined synonym.

| Symptom specific                            | Include                                                                                   | Exclude                                                 |
|---------------------------------------------|-------------------------------------------------------------------------------------------|---------------------------------------------------------|
| New loss of taste or smell                  | Anosmia, loss of taste, loss of smell                                                     | Injury related to loss of taste/smell                   |
| Congestion or runny nose                    | Rhinorrhea, congestion, discharge, nose is dripping, running, or stuffy                   |                                                         |
| Cough                                       | Tussive or post-tussive, cough is unproductive, productive, dry, wet, or producing sputum | Wheeze, crackles, croup                                 |
| Diarrhea                                    | Diarrhea or watery stool                                                                  | Loose stool, bloody stool                               |
| Fatigue                                     | Fatigue, tired, exhausted, weary, malaise, feeling generally unwell                       | Looked ill                                              |
| Fever or chills                             | Fever, pyrexia, chills, or temperature $\geq 100.4$ °F [38 °C]                            | Afebrile, felt warm                                     |
| Headache                                    | HA/headache, migraine, cephalgia, head pain                                               | Headache due to injury                                  |
| Muscle or body aches                        | Myalgias, myoneuralgia, muscle or body aches, soreness, generalized aches and pains       | Localized pain, injury, abdominal pain, lower back pain |
| Nausea or vomiting                          | Nausea, vomiting, emesis, throw up, queasy, regurgitated                                  | Gastritis, gastroparesis                                |
| Shortness of breath or difficulty breathing | Dyspnea, breathing is short, difficult, increased, labored, or distressed                 | BiPAP, CPAP, oxygen need                                |
| Sore throat                                 | Sore throat, throat pain, pharyngeal pain, pharyngitis,odynophagia                        | Streptococcus, dysphagia, hoarseness, red throat        |
