# Supplementary material for: Moving Biosurveillance Beyond Coded Data: AI for Symptom Detection from Physician Notes
Source: bioRxiv or medRxiv preprint supplement (doi:10.1101/2023.09.24.23295960), 2023-09-25
Supplement: Supplementary file [file media-2.pdf]

**Supplement 2. Time series figures.** Prevalence of 11 COVID-19 symptoms detected by natural language processing and ICD-10 coding during emergency department encounters with patients with COVID-19.

Supplementary information for:

Moving Biosurveillance Beyond Coded Data: AI for Symptom Detection from Physician Notes

Andrew McMurry,<sup>1,2</sup> Amy R Zipursky,<sup>1,3</sup> Alon Geva,<sup>1,4,5</sup> Karen L Olson,<sup>1,2</sup> James Jones,<sup>1,2</sup> Vlad Ignatov,<sup>1</sup> Timothy Miller,<sup>1,2</sup> Kenneth D Mandl<sup>1,2,6,\*</sup>

<sup>1</sup> Computational Health Informatics Program, Boston Children's Hospital, Boston, Massachusetts, United States of America

<sup>2</sup> Department of Pediatrics, Harvard Medical School, Boston, Massachusetts, United States of America

<sup>3</sup> Division of Emergency Medicine, The Hospital for Sick Children, Toronto, Ontario, Canada

<sup>4</sup> Division of Critical Care Medicine, Department of Anesthesiology, Critical Care, and Pain Medicine, Boston Children's Hospital, Boston, Massachusetts, United States of America

<sup>5</sup> Department of Anaesthesia, Harvard Medical School, Boston, MA, USA

<sup>6</sup> Department of Biomedical Informatics, Harvard Medical School, Boston, Massachusetts, United States of America

\*Corresponding author

E-mail: [kenneth\\_mandl@harvard.edu](mailto:kenneth_mandl@harvard.edu) (KDM)

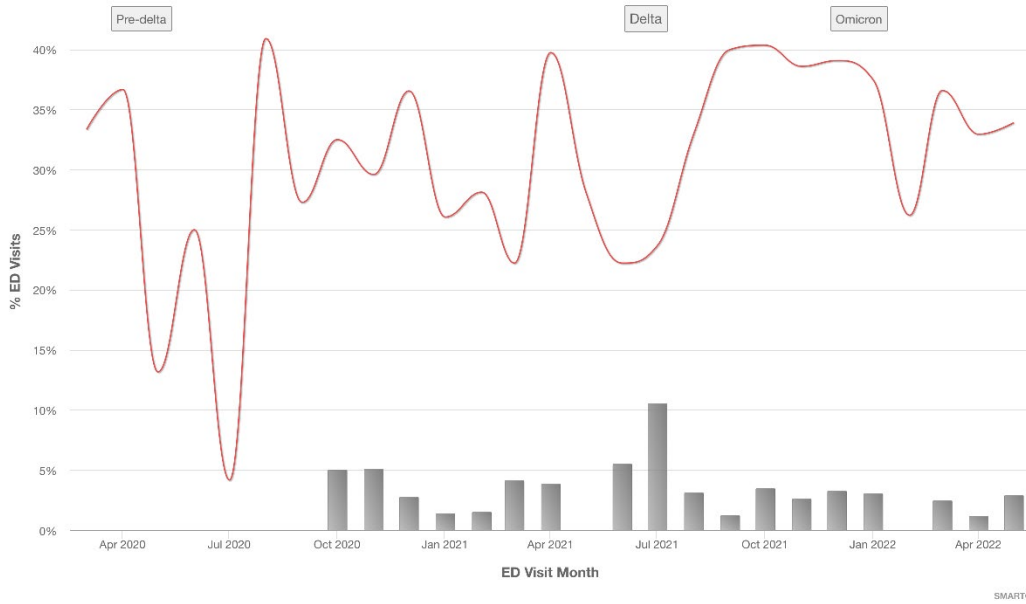

**Figure 1. Prevalence of congestion during emergency department encounters with patients with COVID-19.** NLP (solid red line): natural language processing, ICD-10 (black bars): International Classification of Diseases, 10th Revision, ED: emergency department.

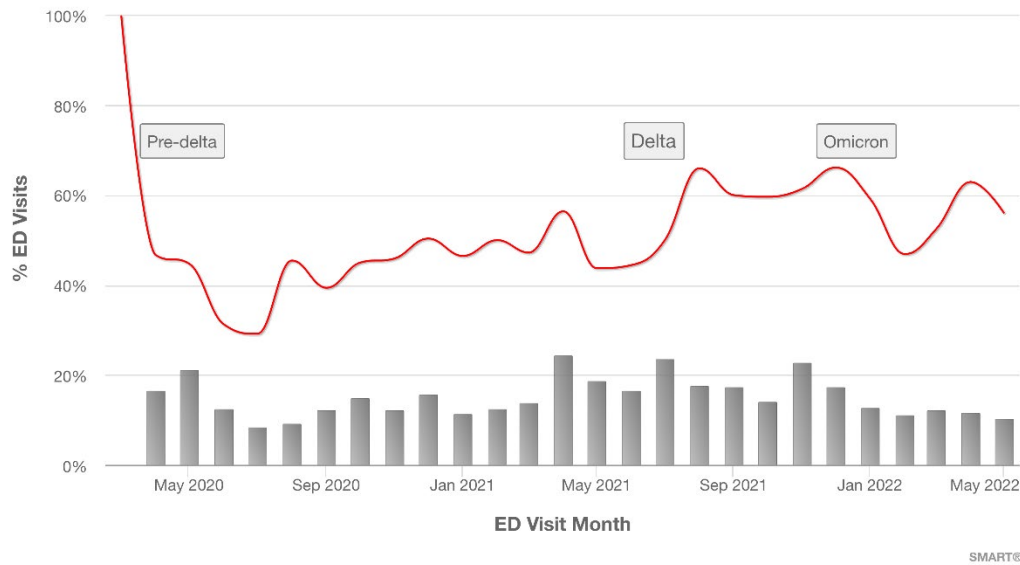

**Figure 2. Prevalence of cough during emergency department encounters with patients with COVID-19.** NLP (solid red line): natural language processing, ICD-10 (black bars): International Classification of Diseases, 10th Revision, ED: emergency department.

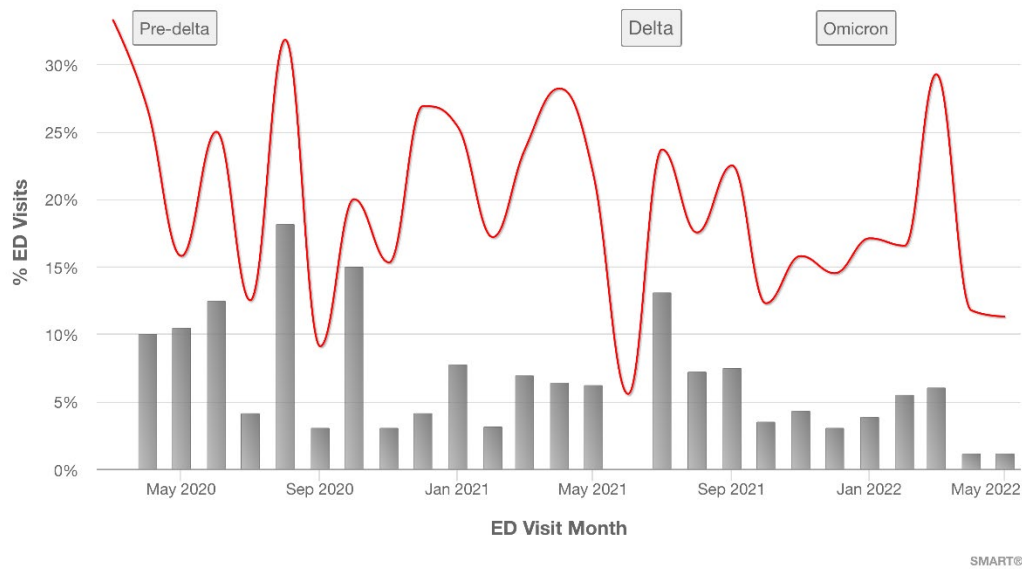

**Figure 3. Prevalence of diarrhea during emergency department encounters with patients with COVID-19.** NLP (solid red line): natural language processing, ICD-10 (black bars): International Classification of Diseases, 10th Revision, ED: emergency department.

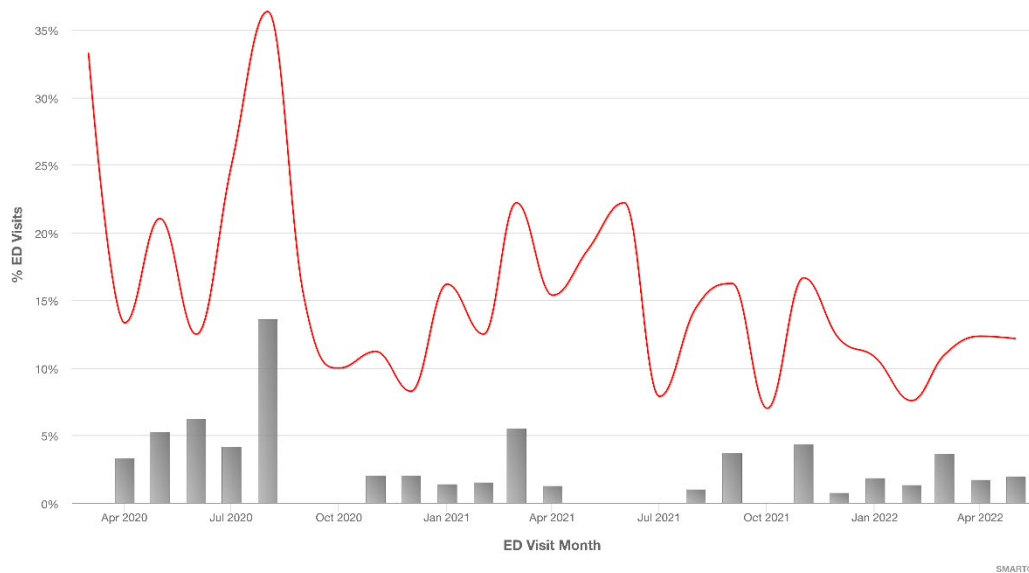

**Figure 4. Prevalence of fatigue during emergency department encounters with patients with COVID-19.** NLP (solid red line): natural language processing, ICD-10 (black bars): International Classification of Diseases, 10th Revision, ED: emergency department.

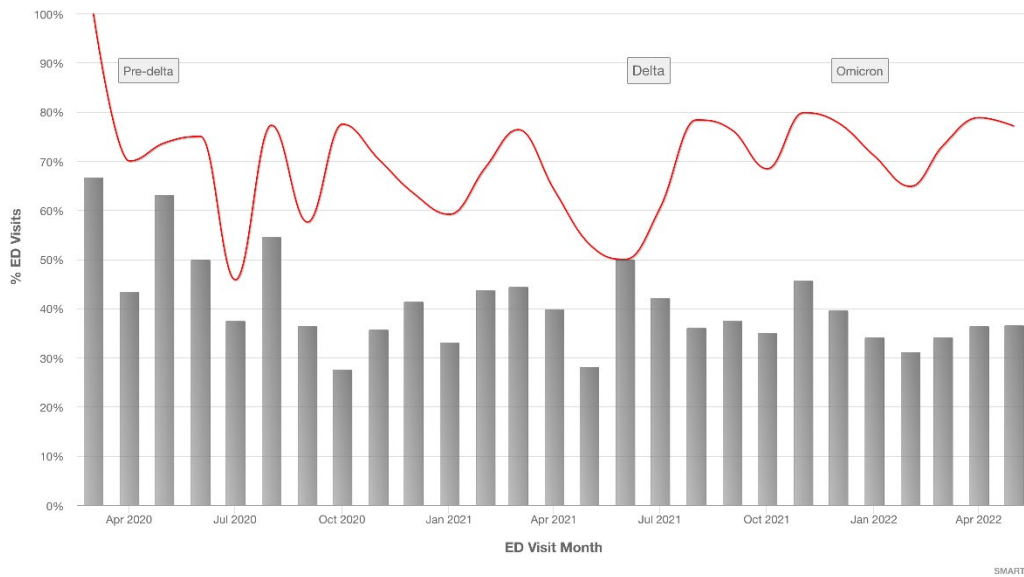

**Figure 5. Prevalence of fever during emergency department encounters with patients with COVID-19.** NLP (solid red line): natural language processing, ICD-10 (black bars): International Classification of Diseases, 10th Revision, ED: emergency department.

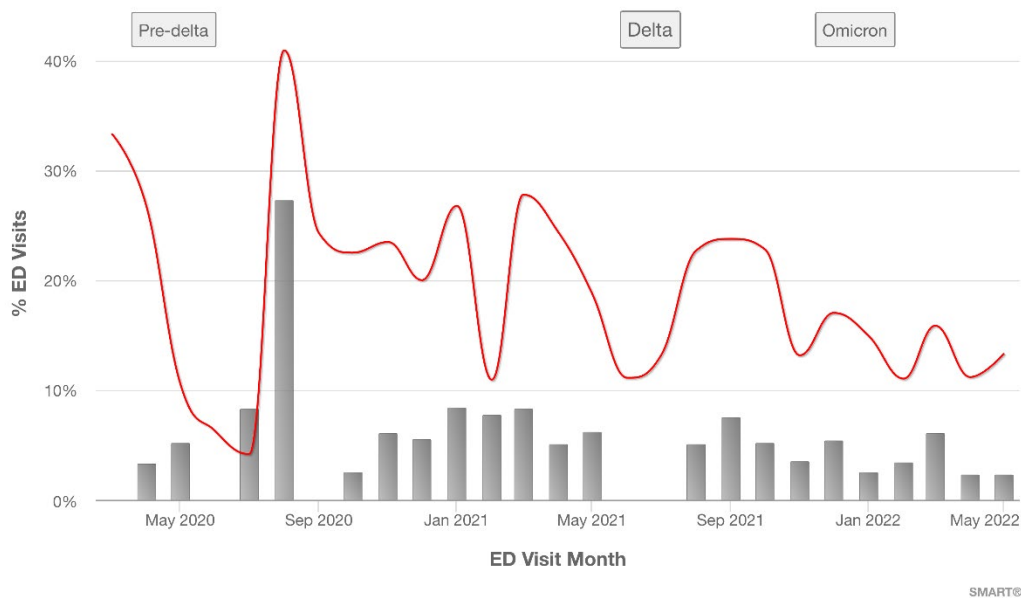

**Figure 6. Prevalence of headache during emergency department encounters with patients with COVID-19.** NLP (solid red line): natural language processing, ICD-10 (black bars): International Classification of Diseases, 10th Revision, ED: emergency department.

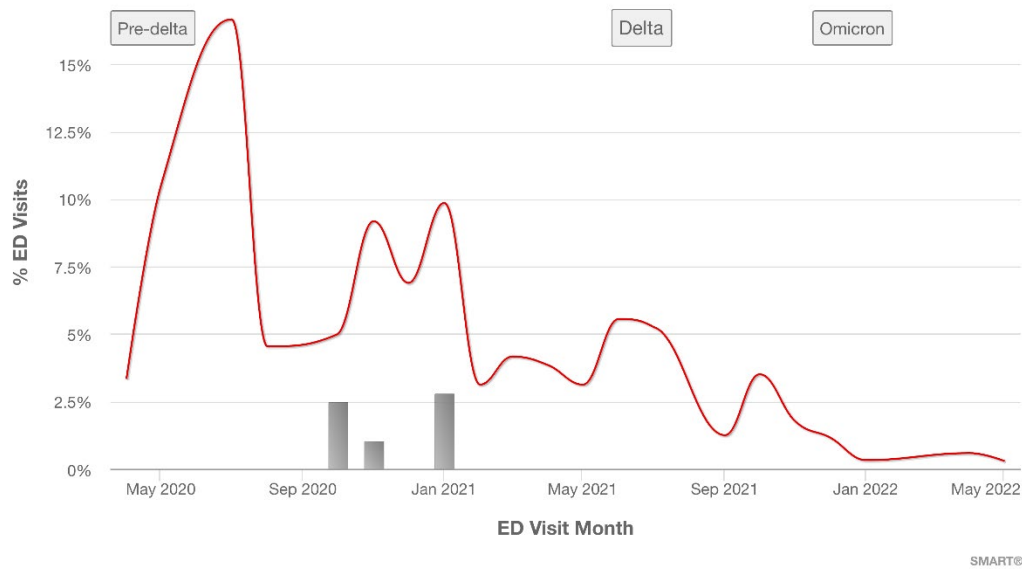

**Figure 7. Prevalence of loss of taste or smell during emergency department encounters with patients with COVID-19.** NLP (solid red line): natural language processing, ICD-10 (black bars): International Classification of Diseases, 10th Revision, ED: emergency department.

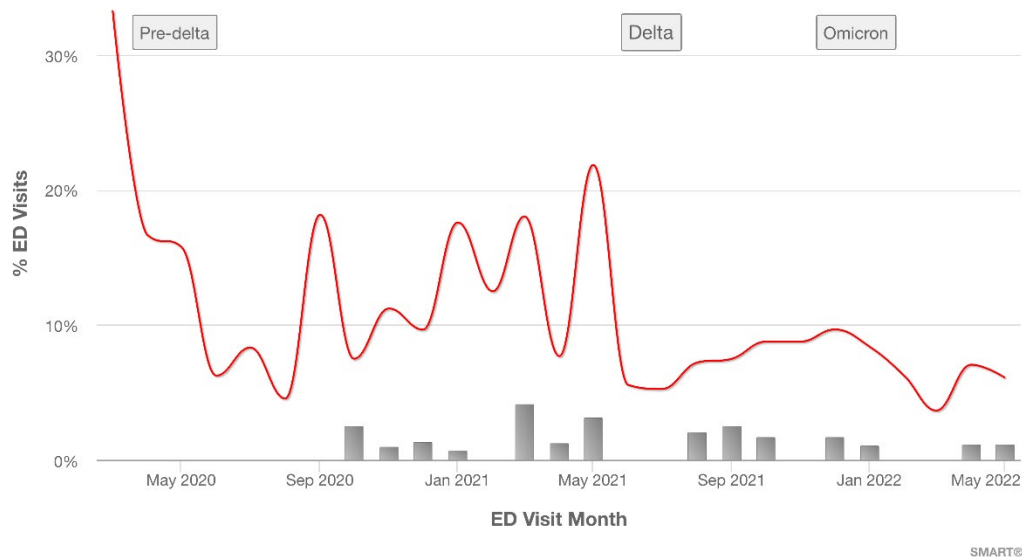

**Figure 8. Prevalence of muscle or body aches during emergency department encounters with patients with COVID-19.** NLP (solid red line): natural language processing, ICD-10 (black bars): International Classification of Diseases, 10th Revision, ED: emergency department.

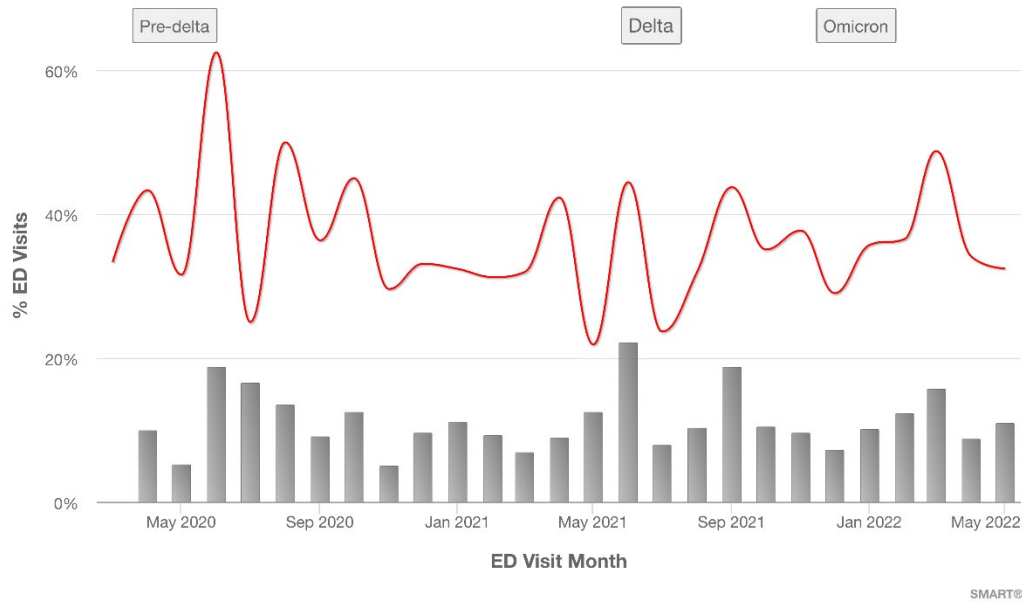

**Figure 9. Prevalence of nausea during emergency department encounters with patients with COVID-19.** NLP (solid red line): natural language processing, ICD-10 (black bars): International Classification of Diseases, 10th Revision, ED: emergency department.

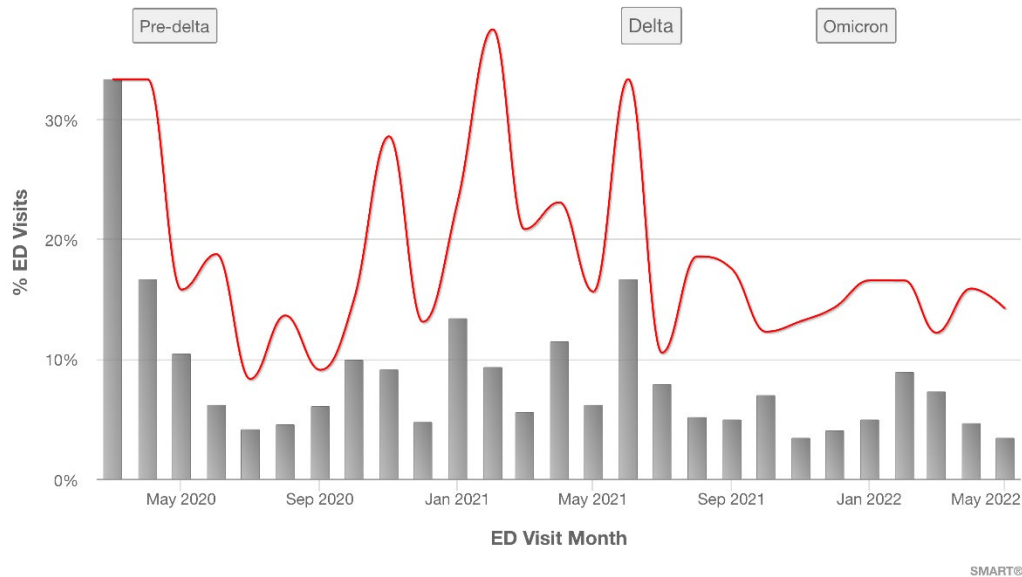

**Figure 10. Prevalence of shortness of breath or difficulty breathing during emergency department encounters with patients with COVID-19.** NLP (solid red line): natural language processing, ICD-10 (black bars): International Classification of Diseases, 10th Revision, ED: emergency department.

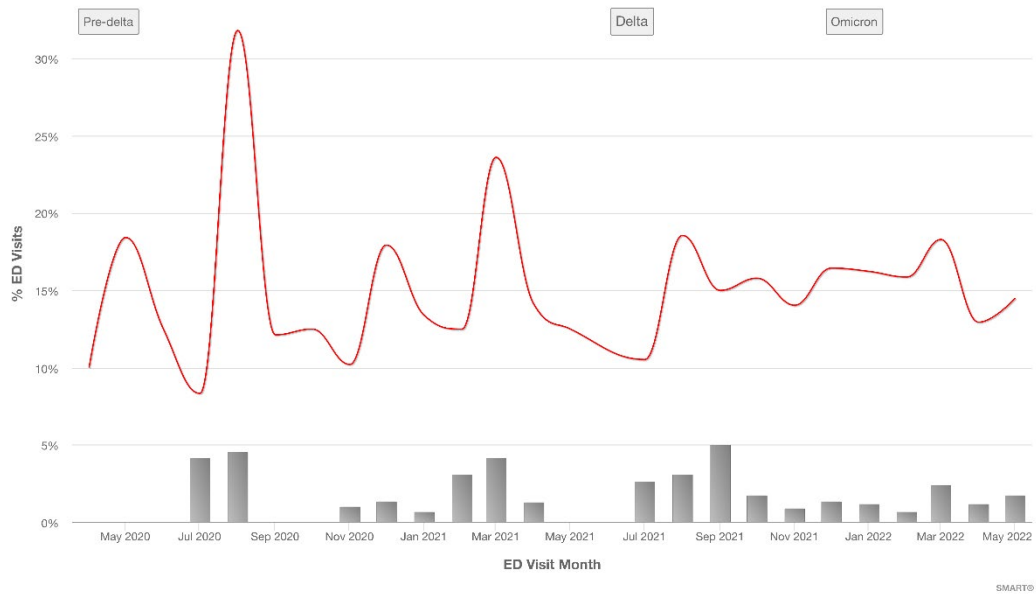

**Figure 11. Prevalence of sore throat during emergency department encounters with patients with COVID-19.** NLP (solid red line): natural language processing, ICD-10 (black bars): International Classification of Diseases, 10th Revision, ED: emergency department.
